# Supplementary material for: Novel antimony-based mixed halides exhibiting an excellent SHG response and a broad transmission range
Source: Royal Society of Chemistry journal article supplement (doi:10.1039/d4qi02757d), 2024-12-05
Supplement: d4qi02757d1.pdf [file d4qi02757d1.pdf]

## Table of contents

| Sections          | Titles                                                                                                                                                                                                                                                                            | Pages |
|-------------------|-----------------------------------------------------------------------------------------------------------------------------------------------------------------------------------------------------------------------------------------------------------------------------------|-------|
| <b>Section S1</b> | Experimental section (Instrumentations and Computational Descriptions).                                                                                                                                                                                                           | S3-4  |
| <b>Table S1</b>   | Crystal data and structure refinement for RbSbF <sub>3</sub> Cl and Rb <sub>3</sub> Sb <sub>4</sub> F <sub>14</sub> Cl.                                                                                                                                                           | S5    |
| <b>Table S2</b>   | Atomic coordinates and equivalent isotropic displacement parameters for RbSbF <sub>3</sub> Cl.                                                                                                                                                                                    | S6    |
| <b>Table S3</b>   | Atomic coordinates and equivalent isotropic displacement parameters for Rb <sub>3</sub> Sb <sub>4</sub> F <sub>14</sub> Cl.                                                                                                                                                       | S7    |
| <b>Table S4</b>   | Selected bond lengths (Å) and angles [°] for RbSbF <sub>3</sub> Cl.                                                                                                                                                                                                               | S8    |
| <b>Table S5</b>   | Selected bond lengths (Å) and angles [°] for Rb <sub>3</sub> Sb <sub>4</sub> F <sub>14</sub> Cl.                                                                                                                                                                                  | S9    |
| <b>Table S6</b>   | The density of Sb <sup>3+</sup> cations in a unit cell.                                                                                                                                                                                                                           | S10   |
| <b>Table S7</b>   | LDT test results of AgGaS <sub>2</sub> , RbSbF <sub>3</sub> Cl, and Rb <sub>3</sub> Sb <sub>4</sub> F <sub>14</sub> Cl.                                                                                                                                                           | S11   |
| <b>Table S8</b>   | Calculation of dipole moment for [SbF <sub>3</sub> Cl <sub>2</sub> ] <sup>2-</sup> polyhedra and net dipole moment for a unit cell in RbSbF <sub>3</sub> Cl (D = Debyes).                                                                                                         | S12   |
| <b>Table S9</b>   | Calculation of dipole moment for [SbF <sub>3</sub> Cl <sub>2</sub> ] <sup>2-</sup> , [SbF <sub>5</sub> ] <sup>2-</sup> , and [SbF <sub>4</sub> ] <sup>-</sup> polyhedra and net dipole moment for a unit cell in Rb <sub>3</sub> Sb <sub>4</sub> F <sub>14</sub> Cl (D = Debyes). | S13   |
| <b>Fig. S1</b>    | The crystal photographs of (a) RbSbF <sub>3</sub> Cl and (b) Rb <sub>3</sub> Sb <sub>4</sub> F <sub>14</sub> Cl.                                                                                                                                                                  | S14   |
| <b>Fig. S2</b>    | The coordination modes of Rb <sup>+</sup> cations in (a) RbSbF <sub>3</sub> Cl and (b) Rb <sub>3</sub> Sb <sub>4</sub> F <sub>14</sub> Cl.                                                                                                                                        | S14   |
| <b>Fig. S3</b>    | Powder X-ray diffraction patterns of (a) RbSbF <sub>3</sub> Cl and (b) Rb <sub>3</sub> Sb <sub>4</sub> F <sub>14</sub> Cl.                                                                                                                                                        | S15   |
| <b>Fig. S4</b>    | TGA curves of (a) RbSbF <sub>3</sub> Cl and (b) Rb <sub>3</sub> Sb <sub>4</sub> F <sub>14</sub> Cl.                                                                                                                                                                               | S15   |
| <b>Fig. S5</b>    | UV-vis-NIR optical diffuse reflectance spectra of (a) RbSbF <sub>3</sub> Cl and (b) Rb <sub>3</sub> Sb <sub>4</sub> F <sub>14</sub> Cl.                                                                                                                                           | S16   |
| <b>Fig. S6</b>    | Calculated refractive index for RbSbF <sub>3</sub> Cl.                                                                                                                                                                                                                            | S16   |
| <b>References</b> |                                                                                                                                                                                                                                                                                   | S17   |

## Section S1. Experimental section

### Instrumentations.

The single-crystal data for  $\text{RbSbF}_3\text{Cl}$  and  $\text{Rb}_3\text{Sb}_4\text{F}_{14}\text{Cl}$  were collected using a Rigaku XtaLAB Synergy R diffractometer and analyzed with SHELX-2014.<sup>1</sup> The coordinates of each atom were refined using a least squares plane convergence algorithm based on the  $F^2$  full matrix. The space group was further analyzed with PLATON, confirming no higher symmetry group.<sup>2</sup> Crystallographic data and additional relevant details for the compound are summarized in Tables S1–S5.

The powder X-ray diffraction data were collected at room temperature using a SmartLab diffractometer with  $\text{Cu K}\alpha$  radiation ( $\lambda = 1.540598 \text{ \AA}$ ). The data were acquired over a  $2\theta$  range of  $5^\circ$ – $70^\circ$  at a scanning rate of  $8^\circ \text{ min}^{-1}$  with a step width of  $0.02^\circ$ .

Thermogravimetric analysis (TGA) measurements were tested using Discovery-TGA thermal analyzer. The sample was heated from room temperature to  $750^\circ\text{C}$  under a nitrogen atmosphere, and the heating rate was set to be  $10^\circ\text{C}\cdot\text{min}^{-1}$ .

The infrared spectra of two compounds were recorded at room temperature using a Vertex 70 Fourier-transform infrared spectrometer (FTIR) within the  $400$ – $4000 \text{ cm}^{-1}$  range. The sample, in powdered form, was mixed with KBr at a 1:100 ratio and pressed into a transparent pellet for analysis.

The UV–vis–NIR diffuse reflectance spectra were measured using a Shimadzu UV-2600 spectrophotometer, covering a wavelength range from  $200$ – $2500 \text{ nm}$ .

The birefringence of  $\text{RbSbF}_3\text{Cl}$  was measured using a polarizing microscope (Carl Zeiss Axioscope 5) with the light source wavelength of  $546 \text{ nm}$ .

The LDT of two crystals were measured with a Nd:YAG laser of  $1064 \text{ nm}$  wavelength and  $10 \text{ ns}$  pulse width. For comparison, the LDT of  $\text{AgGaS}_2$  (AGS), which is available commercially, was also measured in the same scenario.

The SHG efficiency of both the compounds was determined following the Kurtz and Perry method,<sup>3</sup> utilizing a Q-switched Nd:YAG laser at  $1064 \text{ nm}$ . To investigate the effect of particle size on SHG efficiency, the crystal was ground into the following

size ranges: 25–45, 45–58, 58–75, 75–106, 106–150, and 150–212  $\mu\text{m}$ . The reference material  $\text{KH}_2\text{PO}_4$  (KDP) was also measured with the same size.

### **Computational Descriptions.**

To understand the electronic structure of  $\text{RbSbF}_3\text{Cl}$  and  $\text{Rb}_3\text{Sb}_4\text{F}_{14}\text{Cl}$ , density functional theory (DFT) calculations were performed to determine the band structure, density of states (DOS), and partial density of states (PDOS).<sup>4</sup> The calculations employed the Perdew-Burke-Ernzerhof (PBE)<sup>5</sup> functional within the generalized gradient approximation (GGA), using norm-conserving pseudopotentials.<sup>6</sup> The criteria of convergences of energy was set as  $1.0 \times 10^{-6}$  eV/atom, and the criteria of convergence of force was set as 0.03 eV/Å. The kinetic energy cutoff of them was 850 eV, and their k-point sampling dimensions in Brillouin were  $3 \times 3 \times 4$  and  $1 \times 2 \times 2$ , respectively.

**Table S1.** Crystal data and structure refinement for RbSbF<sub>3</sub>Cl and Rb<sub>3</sub>Sb<sub>4</sub>F<sub>14</sub>Cl.

| Formula                                                                                  | RbSbF <sub>3</sub> Cl | Rb <sub>3</sub> Sb <sub>4</sub> F <sub>14</sub> Cl |
|------------------------------------------------------------------------------------------|-----------------------|----------------------------------------------------|
| Formula weight                                                                           | 300.28                | 1044.86                                            |
| Crystal System                                                                           | tetragonal            | orthorhombic                                       |
| Space Group                                                                              | $\bar{I}42m$          | $Pmn2_1$                                           |
| <i>a</i> (Å)                                                                             | 9.8659 (2)            | 30.5126 (9)                                        |
| <i>b</i> (Å)                                                                             | 9.8659 (2)            | 7.4783 (2)                                         |
| <i>c</i> (Å)                                                                             | 10.8193 (4)           | 7.3322 (2)                                         |
| <i>α</i> (°)                                                                             | 90                    | 90                                                 |
| <i>β</i> (°)                                                                             | 90                    | 90                                                 |
| <i>γ</i> (°)                                                                             | 90                    | 90                                                 |
| <i>V</i> (Å <sup>3</sup> )                                                               | 1053.11 (6)           | 1673.08(8)                                         |
| <i>Z</i>                                                                                 | 8                     | 4                                                  |
| $\rho$ (calcd) (g/cm <sup>3</sup> )                                                      | 3.788                 | 4.148                                              |
| Temperature (K)                                                                          | 297.28 (10)           | 298.63(10)                                         |
| <i>F</i> (000)                                                                           | 1058.0                | 1832.0                                             |
| $\mu$ (mm <sup>-1</sup> )                                                                | 14.878                | 15.344                                             |
| <i>R</i> <sub>1</sub> , <i>wR</i> <sub>2</sub> ( <i>I</i> > 2σ( <i>I</i> )) <sup>a</sup> | 0.0160/0.0367         | 0.0203/0.0374                                      |
| GOF on <i>F</i> <sup>2</sup>                                                             | 1.078                 | 1.024                                              |

$$^a R_1(F) = \sum ||F_o| - |F_c|| / \sum |F_o|. \quad wR_2(F_o^2) = [\sum w(F_o^2 - F_c^2)^2 / \sum w(F_o^2)^2]^{1/2}$$

**Table S2.** Atomic coordinates ( $\times 10^4$ ) and equivalent isotropic displacement parameters ( $\text{\AA}^2 \times 10^3$ ) for  $\text{RbSbF}_3\text{Cl}$ .  $U_{(\text{eq})}$  is defined as one third of the trace of the orthogonalized  $U_{ij}$  tensor.

| atom | $x$        | $y$        | $z$        | $U_{\text{eq}}(\text{\AA}^2)$ | BVS  |
|------|------------|------------|------------|-------------------------------|------|
| Sb1  | 2886.9 (4) | 7113.1 (4) | 5446.4 (5) | 21.78 (14)                    | 3.11 |
| Rb1  | 5000       | 5000       | 8032.7 (8) | 33.0 (2)                      | 0.98 |
| Rb2  | 5000       | 10000      | 7500       | 38.1 (2)                      | 1.00 |
| Cl1  | 2872 (2)   | 10000      | 5000       | 43.3 (4)                      | 0.89 |
| F1   | 4644 (3)   | 7295 (4)   | 6280 (3)   | 49.4 (8)                      | 1.05 |
| F2   | 2186 (4)   | 7814 (4)   | 6970 (4)   | 61.8 (13)                     | 1.29 |

**Table S3.** Atomic coordinates ( $\times 10^4$ ) and equivalent isotropic displacement parameters ( $\text{\AA}^2 \times 10^3$ ) for  $\text{Rb}_3\text{Sb}_4\text{F}_{14}\text{Cl}$ .  $U_{(\text{eq})}$  is defined as one third of the trace of the orthogonalized  $U_{ij}$  tensor.

| atom | $x$         | $y$          | $z$         | $U_{\text{eq}} (\text{\AA}^2)$ | BVS  |
|------|-------------|--------------|-------------|--------------------------------|------|
| Sb1  | 5000        | 10689.2 (5)  | 7153.7 (7)  | 19.48 (13)                     | 3.08 |
| Sb2  | 5000        | 4115.4 (6)   | 2591.4 (8)  | 24.05 (13)                     | 3.20 |
| Sb3  | 4239.0 (2)  | 8638.9 (4)   | 2324.3 (6)  | 20.17 (8)                      | 3.00 |
| Sb4  | 3531.4 (2)  | 10568.7 (4)  | 6768.8 (5)  | 21.98 (9)                      | 2.90 |
| Sb5  | 2795.2 (2)  | 5544.8 (4)   | 6914.2 (5)  | 20.15 (9)                      | 3.09 |
| Rb1  | 4246.7 (2)  | 5854.8 (7)   | 7346.7 (11) | 39.19 (16)                     | 0.93 |
| Rb2  | 3551.9 (2)  | 13968.0 (7)  | 2188.0 (9)  | 31.95 (14)                     | 0.98 |
| Rb3  | 2105.1 (2)  | 897.9 (6)    | 6719.8 (10) | 28.45 (15)                     | 1.15 |
| Cl1  | 5718.6 (5)  | 11862.9 (19) | 9434 (2)    | 35.2 (3)                       | 1.09 |
| F1   | 5000        | 8711 (6)     | 8836 (7)    | 44.8 (13)                      | 1.02 |
| F2   | 4553.5 (10) | 9297 (4)     | 5849 (5)    | 38.0 (8)                       | 0.96 |
| F3   | 5450.1 (15) | 3161 (6)     | 4255 (7)    | 80.0 (15)                      | 0.92 |
| F4   | 5000        | 6069 (8)     | 4295 (8)    | 54.4 (15)                      | 1.06 |
| F5   | 4467.1 (10) | 6027 (4)     | 1373 (5)    | 40.9 (8)                       | 0.91 |
| F6   | 3938.5 (10) | 7060 (4)     | 3997 (5)    | 33.1 (7)                       | 1.23 |
| F7   | 3765.8 (9)  | 10335 (4)    | 3205 (5)    | 32.5 (7)                       | 0.95 |
| F8   | 3810.0 (10) | 8008 (4)     | 500 (5)     | 36.6 (8)                       | 1.09 |
| F9   | 3592.9 (10) | 13110 (4)    | 6105 (5)    | 36.9 (8)                       | 1.05 |
| F10  | 2994.1 (10) | 10670 (5)    | 5399 (5)    | 41.1 (9)                       | 1.19 |
| F11  | 3194.6 (11) | 11364 (5)    | 8851 (5)    | 42.4 (9)                       | 1.11 |
| F12  | 3222.8 (11) | 7637 (5)     | 7523 (6)    | 59.0 (11)                      | 0.90 |
| F13  | 2920.2 (10) | 6287 (5)     | 4427 (5)    | 39.6 (8)                       | 1.11 |
| F14  | 2365.8 (9)  | 7376 (3)     | 7264 (6)    | 38.3 (8)                       | 1.26 |
| F15  | 2268.2 (11) | 4372 (4)     | 5602 (5)    | 37.8 (8)                       | 0.92 |

**Table S4.** Selected bond distances (Å) and angles [°] for RbSbF<sub>3</sub>Cl.

|                                        |             |                                          |             |
|----------------------------------------|-------------|------------------------------------------|-------------|
| Sb1—F2                                 | 1.917 (4)   | Cl1 <sup>11</sup> —Rb2—Cl1               | 75.63 (5)   |
| Sb1—F1                                 | 1.962 (3)   | Cl1 <sup>1</sup> —Rb2—Cl1 <sup>11</sup>  | 128.62 (3)  |
| Sb1—Cl1 <sup>3</sup>                   | 2.8888 (4)  | Cl1—Rb2—F2                               | 52.76 (8)   |
| Rb1—Cl1 <sup>5</sup>                   | 3.5441 (17) | Cl1 <sup>1</sup> —Rb2—F2                 | 119.89 (7)  |
| Rb1—F1                                 | 2.974 (4)   | F1 <sup>1</sup> —Rb2—Cl1 <sup>1</sup>    | 65.19 (6)   |
| Rb1—F2 <sup>5</sup>                    | 3.050 (5)   | F1 <sup>5</sup> —Rb2—Cl1                 | 153.33 (7)  |
| Rb2—Cl1 <sup>11</sup>                  | 3.4238 (13) | F1 <sup>5</sup> —Rb2—F1                  | 101.17 (5)  |
| Rb2—F1 <sup>11</sup>                   | 2.998 (4)   | F1 <sup>5</sup> —Rb2—F1 <sup>1</sup>     | 127.76 (12) |
| Rb2—F2                                 | 3.5620 (11) | F1—Rb2—F2 <sup>1</sup>                   | 45.48 (10)  |
| Cl1 <sup>3</sup> —Sb1—Cl1              | 87.84 (8)   | F1—Rb2—F2 <sup>1</sup>                   | 133.93 (10) |
| F1—Sb1—Cl1                             | 89.50 (11)  | F2 <sup>11</sup> —Rb2—F2 <sup>1</sup>    | 91.49 (2)   |
| F1—Sb1—Cl1 <sup>3</sup>                | 161.32 (10) | F2 <sup>1</sup> —Rb2—F2 <sup>5</sup>     | 161.47 (14) |
| F2—Sb1—Cl1                             | 77.65 (12)  | Sb1 <sup>12</sup> —Cl1—Rb1 <sup>13</sup> | 84.47 (3)   |
| F2—Sb1—F1                              | 83.72 (15)  | Sb1—Cl1—Rb1 <sup>13</sup>                | 95.99 (4)   |
| F1 <sup>4</sup> —Sb1—F1                | 87.1 (2)    | Sb1 <sup>12</sup> —Cl1—Rb2 <sup>14</sup> | 82.24 (2)   |
| Cl1 <sup>7</sup> —Rb1—Cl1 <sup>6</sup> | 68.86 (2)   | Sb1—Cl1—Rb2 <sup>14</sup>                | 97.41 (3)   |
| Cl1 <sup>5</sup> —Rb1—Cl1 <sup>6</sup> | 106.18 (5)  | Rb1 <sup>13</sup> —Cl1—Rb1 <sup>1</sup>  | 73.82 (5)   |
| F1—Rb1—Cl1 <sup>5</sup>                | 76.96 (7)   | Rb2—Cl1—Rb1 <sup>1</sup>                 | 90.904 (14) |
| F1 <sup>4</sup> —Rb1—Cl1 <sup>7</sup>  | 172.57 (6)  | Rb2 <sup>14</sup> —Cl1—Rb1 <sup>1</sup>  | 164.72 (5)  |
| F1—Rb1—F1 <sup>4</sup>                 | 54.09 (11)  | Rb2—Cl1—Rb2 <sup>14</sup>                | 104.37 (5)  |
| F1 <sup>4</sup> —Rb1—F1 <sup>10</sup>  | 100.77 (13) | Sb1—F1—Rb1                               | 109.15 (13) |
| F1 <sup>4</sup> —Rb1—F2 <sup>6</sup>   | 62.92 (8)   | Sb1—F1—Rb2                               | 112.77 (15) |
| F1 <sup>10</sup> —Rb1—F2 <sup>6</sup>  | 117.01 (8)  | Rb1—F1—Rb2                               | 112.52 (10) |
| F2 <sup>6</sup> —Rb1—Cl1 <sup>6</sup>  | 55.61 (6)   | Sb1—F2—Rb1 <sup>1</sup>                  | 120.6 (2)   |
| F2 <sup>6</sup> —Rb1—Cl1 <sup>7</sup>  | 124.47 (7)  | Sb1—F2—Rb2 <sup>2</sup>                  | 94.34 (8)   |
| F2 <sup>5</sup> —Rb1—F2 <sup>6</sup>   | 179.89 (18) | Rb1 <sup>1</sup> —F2—Rb2 <sup>2</sup>    | 97.08 (8)   |

Symmetry codes: (1)-1/2+y,3/2-x,3/2-z; (2)1/2-x,-1/2+y,3/2-z; (3)-1+y,1-x,1-z; (4)1-y,1-x,+z; (5)1/2+x,-1/2+y,1/2+z; (6)3/2-y,1/2+x,3/2-z; (7)-1/2+y,1/2-x,3/2-z; (8)1/2-x,3/2-y,1/2+z; (9)1-x,1-y,+z; (10)+y,+x,+z; (11)1-x,2-y,+z; (12)1-y,1+x,1-z; (13)-1/2+x,1/2+y,-1/2+z; (14)1-x,+y,1-z; (15)+y,1-x,1-z.



**Table S5.** Selected bond distances (Å) and angles [°] for Rb<sub>3</sub>Sb<sub>4</sub>F<sub>14</sub>Cl.

|                                       |             |                                        |             |
|---------------------------------------|-------------|----------------------------------------|-------------|
| Sb1—Cl1                               | 2.8936 (15) | F1—Sb1—F2                              | 84.54 (16)  |
| Sb1—F1                                | 1.926 (5)   | F2 <sup>4</sup> —Sb1—F2                | 87.87 (19)  |
| Sb1—F2                                | 1.963 (3)   | F4—Sb2—F5                              | 77.52 (16)  |
| Sb2—F4                                | 1.923 (5)   | F3 <sup>4</sup> —Sb2—F5 <sup>4</sup>   | 160.21 (17) |
| Sb2—F5                                | 2.342 (3)   | F8—Sb3—F5                              | 77.09 (13)  |
| Sb3—F8                                | 1.930 (3)   | F7—Sb3—F5                              | 152.46 (12) |
| Sb3—F5                                | 2.188 (3)   | F10—Sb4—F12                            | 79.96 (13)  |
| Sb4—F10                               | 1.924 (3)   | F9—Sb4—F12                             | 162.85 (12) |
| Sb4—F12                               | 2.450 (3)   | F14—Sb5—F15                            | 80.41 (13)  |
| Sb5—F14                               | 1.913 (2)   | F15—Sb5—F12                            | 154.66 (14) |
| Sb5—F12                               | 2.085 (3)   | Cl1 <sup>12</sup> —Rb1—F12             | 111.12 (7)  |
| Rb1—Cl1 <sup>11</sup>                 | 3.3563 (16) | F3 <sup>4</sup> —Rb1—F4                | 47.54 (11)  |
| Rb1—F6                                | 2.780 (3)   | F8 <sup>11</sup> —Rb1—F3 <sup>4</sup>  | 169.53 (10) |
| Rb1—F12                               | 3.399 (4)   | Cl1 <sup>8</sup> —Rb2—F3 <sup>9</sup>  | 66.54 (8)   |
| Rb2—Cl1 <sup>8</sup>                  | 3.3928 (16) | F5 <sup>6</sup> —Rb2—F8 <sup>6</sup>   | 45.85 (7)   |
| Rb2—F7                                | 2.892 (3)   | F14 <sup>10</sup> —Rb2—F5 <sup>6</sup> | 166.84 (9)  |
| Rb2—F3 <sup>10</sup>                  | 3.454 (5)   | F8 <sup>5</sup> —Rb3—F12 <sup>1</sup>  | 51.71 (8)   |
| Rb3—F15                               | 2.769 (3)   | F10 <sup>3</sup> —Rb3—F7 <sup>5</sup>  | 158.66 (9)  |
| Rb3—F12 <sup>1</sup>                  | 3.416 (4)   | Sb1—Cl1—Rb2 <sup>13</sup>              | 169.04 (5)  |
| Cl1—Sb1—Cl1 <sup>4</sup>              | 98.54 (6)   | Sb1—F1—Rb1 <sup>4</sup>                | 106.45 (16) |
| F1—Sb1—Cl1 <sup>4</sup>               | 82.12 (11)  | Sb1—F2—Rb1                             | 120.08 (16) |
| F2 <sup>4</sup> —Sb1—Cl1 <sup>4</sup> | 165.50 (10) | Sb2—F3—Rb1 <sup>4</sup>                | 114.57 (18) |

Symmetry codes: (1) 1/2-x, 1-y, -1/2+z; (2) +x, +y, -1+z; (3) +x, -1+y, +z; (4) 1-x, +y, +z; (5) 1/2-x, 1-y, 1/2+z; (6)+x, 1+y, +z; (7) 1/2-x, 2-y, 1/2+z; (8) 1-x, +y, -1+z; (9) 1-x, 1+y, +z; (10) 1/2-x, 2-y, -1/2+z; (11) +x, +y, 1+z; (12) 1-x, -1+y, +z; (13) 1-x, +y, 1+z.

**Table S6.** The density of  $\text{Sb}^{3+}$  cations in a unit cell.

| Compounds                                          | $n$ (Sb) | $V$ ( $\text{\AA}^3$ ) | $\rho$ (Sb) ( $\text{\AA}^{-3}$ ) |
|----------------------------------------------------|----------|------------------------|-----------------------------------|
| RbSbF <sub>3</sub> Cl                              | 8        | 1053.11                | 0.0076                            |
| Rb <sub>3</sub> Sb <sub>4</sub> F <sub>14</sub> Cl | 18       | 1673.08                | 0.0110                            |

$n$ : the number of  $\text{Sb}^{3+}$  cations in a unit cell.  $V$ : the cell volume.  $\rho$ : the density of  $\text{Sb}^{3+}$  cations in a unit cell,  $\rho=n/V$ .

**Table S7.** LDT test results of AgGaS<sub>2</sub>, RbSbF<sub>3</sub>Cl, and Rb<sub>3</sub>Sb<sub>4</sub>F<sub>14</sub>Cl.

| Formula                                            | Energy/mJ | Spot area/mm <sup>2</sup> | Pulse width/ns | LDT/(MW/cm <sup>2</sup> ) |
|----------------------------------------------------|-----------|---------------------------|----------------|---------------------------|
| AgGaS <sub>2</sub>                                 | 3.0       | 20                        | 10             | 30                        |
| RbSbF <sub>3</sub> Cl                              | 16.3      | 20                        | 10             | 163                       |
| Rb <sub>3</sub> Sb <sub>4</sub> F <sub>14</sub> Cl | 22.3      | 20                        | 10             | 223                       |

**Table S8.** Calculation of dipole moment for  $[\text{SbF}_3\text{Cl}_2]^{2-}$  polyhedra and net dipole moment for a unit cell in  $\text{RbSbF}_3\text{Cl}$  (D = Debyes).

| RbSbF <sub>3</sub> Cl            |                            |              |              |                 |
|----------------------------------|----------------------------|--------------|--------------|-----------------|
| Polar unit<br>(aunit cell)       | Dipole moment (D)          |              |              |                 |
|                                  | x-component                | y-component  | z-component  | total magnitude |
| SbF <sub>3</sub> Cl <sub>2</sub> | -8.501490841               | 8.501490841  | -15.96604147 | 19.98662486     |
|                                  | 8.501490841                | -8.501490841 | -15.96604147 | 19.98662486     |
|                                  | -8.501490841               | -8.501490841 | 15.96604147  | 19.98662486     |
|                                  | 8.501490841                | 8.501490841  | 15.96604147  | 19.98662486     |
|                                  | 8.501490841                | 8.501490841  | 15.96604147  | 19.98662486     |
|                                  | -8.501490841               | -8.501490841 | 15.96604147  | 19.98662486     |
|                                  | 8.501490841                | -8.501490841 | -15.96604147 | 19.98662486     |
|                                  | -8.501490841               | 8.501490841  | -15.96604147 | 19.98662486     |
|                                  | $U_x$                      | $U_y$        | $U_z$        | $U_t$           |
| Net dipole moment                | -1.95399E-14               | -2.13163E-14 | 3.55271E-14  | 4.5808E-14      |
| Cell Volume                      | 1053.11 (6) Å <sup>3</sup> |              |              |                 |

**Table S9.** Calculation of dipole moment for  $[\text{SbF}_3\text{Cl}_2]^{2-}$ ,  $[\text{SbF}_5]^{2-}$  and  $[\text{SbF}_4]^-$  polyhedra and net dipole moment for a unit cell in  $\text{Rb}_3\text{Sb}_4\text{F}_{14}\text{Cl}$  (D = Debyes).

| Rb <sub>3</sub> Sb <sub>4</sub> F <sub>14</sub> Cl |                            |              |              |                 |
|----------------------------------------------------|----------------------------|--------------|--------------|-----------------|
| Polar unit<br>(aunit cell)                         | Dipole moment (D)          |              |              |                 |
|                                                    | x-component                | y-component  | z-component  | total magnitude |
| Sb1F <sub>3</sub> Cl <sub>2</sub>                  | 0.000409587                | -12.73467075 | -11.72701802 | 17.3116952      |
|                                                    | -0.000409587               | -12.73467075 | -11.72701802 | 17.3116952      |
|                                                    | 1.42109E-14                | 12.73415092  | -11.73013085 | 17.31342165     |
|                                                    | $U_x$                      | $U_y$        | $U_z$        | $U_t$           |
|                                                    | 2.66454E-15                | -12.73519057 | -35.18416688 | 37.41805284     |
| Sb2F <sub>5</sub>                                  | 0                          | -10.99913869 | -15.21747426 | 18.77638343     |
|                                                    | -0.002023019               | 10.9992254   | -15.20926125 | 18.76977867     |
|                                                    | 0.002023019                | 10.9992254   | -15.20926125 | 18.76977867     |
|                                                    | $U_x$                      | $U_y$        | $U_z$        | $U_t$           |
|                                                    | 6.21725E-15                | 10.99931212  | -45.63599675 | 46.94282764     |
| Sb3F <sub>4</sub>                                  | 17.63613625                | 11.22280952  | 0.248184832  | 20.90565357     |
|                                                    | -17.63613625               | 11.22280952  | 0.248184832  | 20.90565357     |
|                                                    | -17.63613625               | -11.22280952 | 0.248184832  | 20.90565357     |
|                                                    | 17.63613625                | -11.22280952 | 0.248184832  | 20.90565357     |
| Sb4F <sub>4</sub>                                  | -17.48122509               | 7.674077512  | -1.933583367 | 19.18914904     |
|                                                    | 17.48122509                | 7.674077512  | -1.933583367 | 19.18914904     |
|                                                    | 17.48110396                | -7.674069815 | -1.933572829 | 19.18903456     |
|                                                    | -17.48110396               | -7.674069815 | -1.933572829 | 19.18903456     |
| Sb5F <sub>4</sub>                                  | -7.453914661               | 14.83178556  | 11.6110415   | 20.25731945     |
|                                                    | 7.458651183                | -14.83381875 | 11.6135617   | 20.26199575     |
|                                                    | -7.458701096               | -14.83395227 | 11.61356981  | 20.26211651     |
|                                                    | 7.453914661                | 14.83178556  | 11.6110415   | 20.25731945     |
|                                                    | $U_x$                      | $U_y$        | $U_z$        | $U_t$           |
|                                                    | -0.000049913               | -0.004184512 | 39.70764145  | 39.70764167     |
| Net dipole moment                                  | -0.000049913               | -1.740062966 | -41.11252218 | 41.14932927     |
| Cell Volume                                        | 1673.08 (8) Å <sup>3</sup> |              |              |                 |

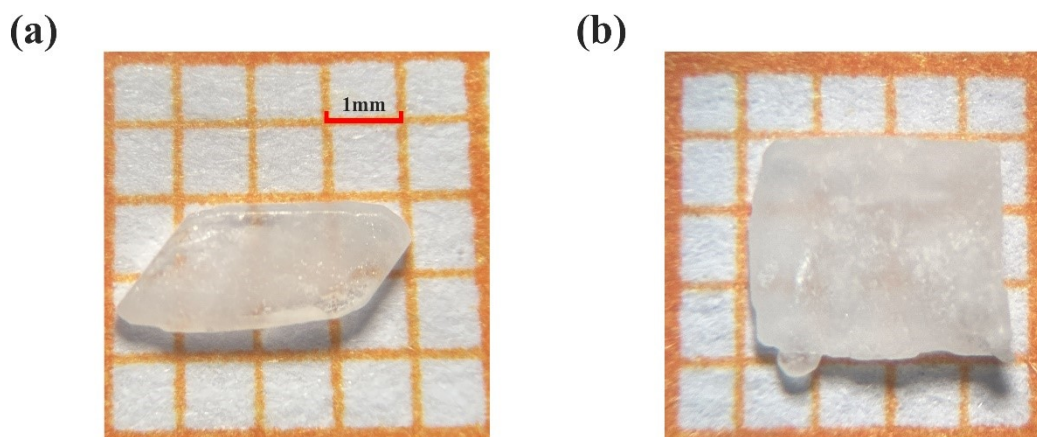

**Fig. S1** The crystal photographs of (a) RbSbF<sub>3</sub>Cl and (b) Rb<sub>3</sub>Sb<sub>4</sub>F<sub>14</sub>Cl.

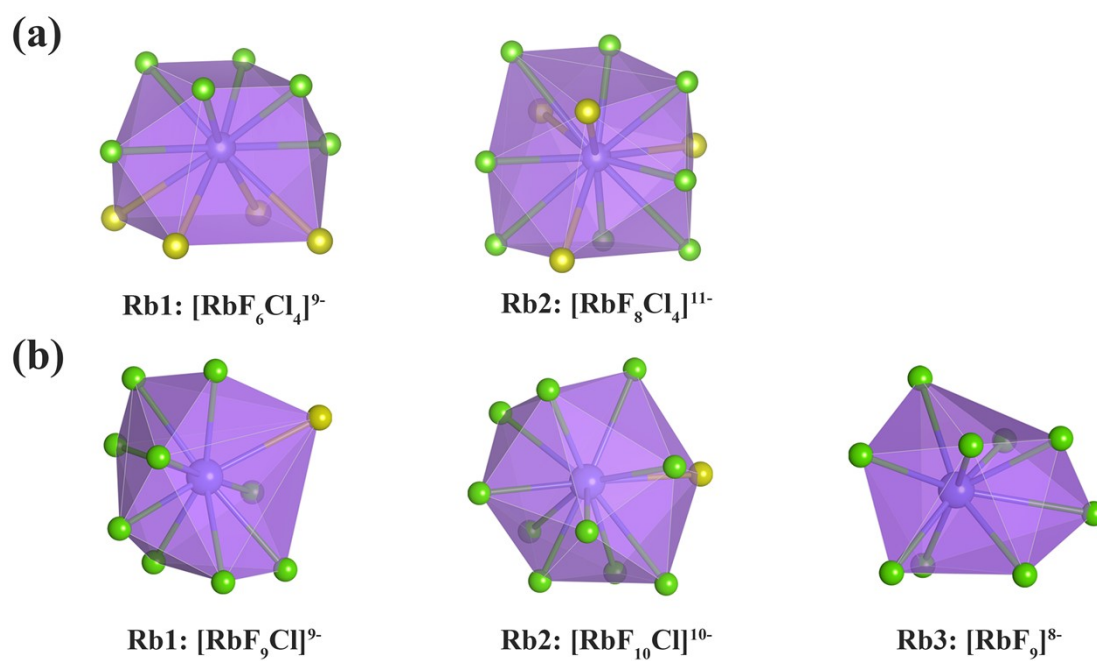

**Fig. S2** The coordination modes of Rb<sup>+</sup> cations in (a) RbSbF<sub>3</sub>Cl and (b) Rb<sub>3</sub>Sb<sub>4</sub>F<sub>14</sub>Cl.

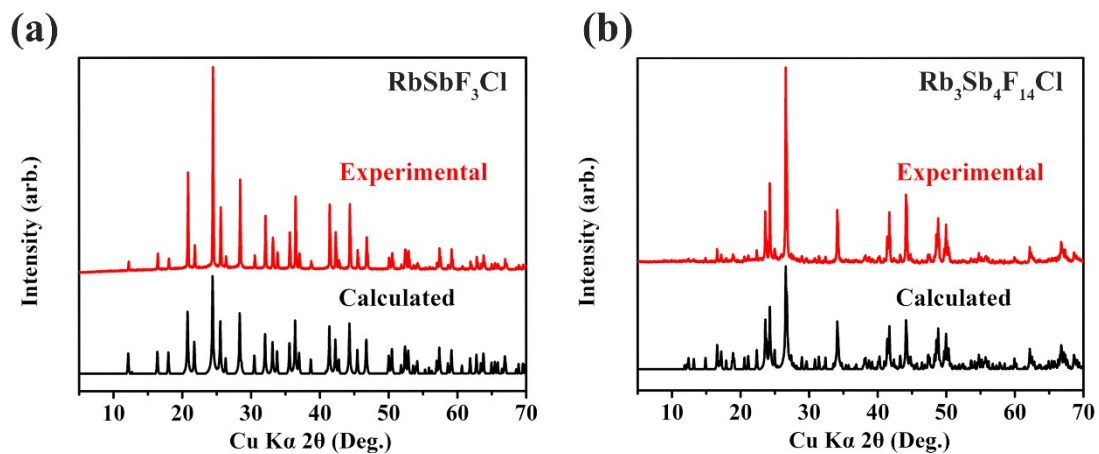

**Fig. S3** Powder X-ray diffraction patterns of (a)  $\text{RbSbF}_3\text{Cl}$  and (b)  $\text{Rb}_3\text{Sb}_4\text{F}_{14}\text{Cl}$ .

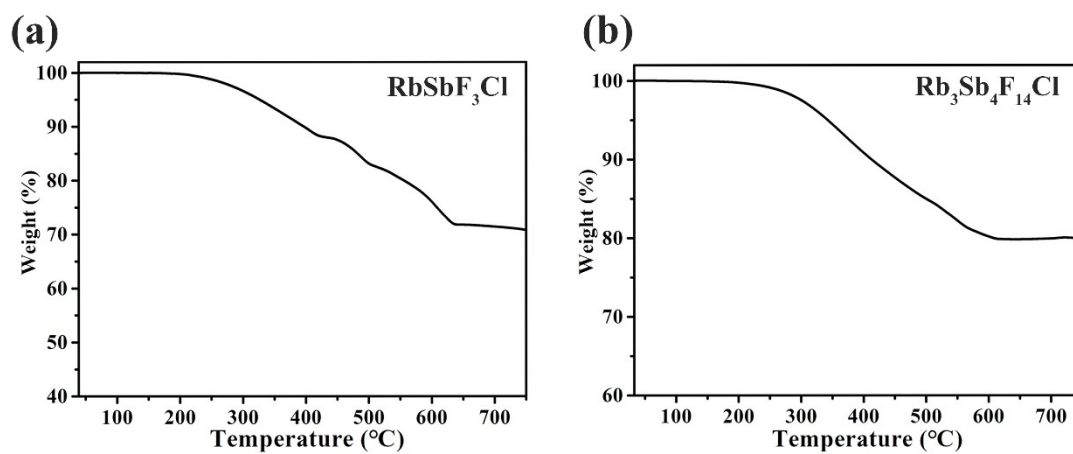

**Fig. S4** TGA curves of (a)  $\text{RbSbF}_3\text{Cl}$  and (b)  $\text{Rb}_3\text{Sb}_4\text{F}_{14}\text{Cl}$ .

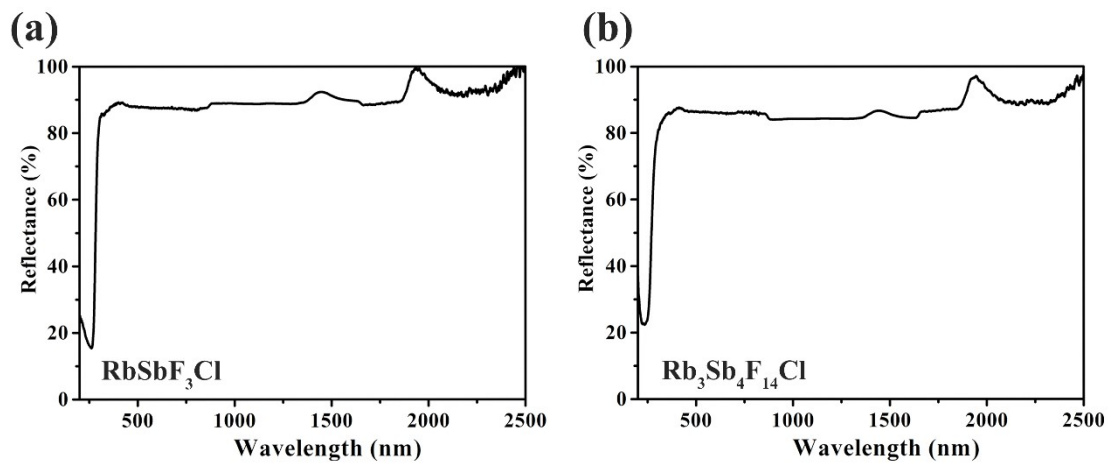

**Fig. S5** UV-vis-NIR optical diffuse reflectance spectra of (a) RbSbF<sub>3</sub>Cl and (b) Rb<sub>3</sub>Sb<sub>4</sub>F<sub>14</sub>Cl.

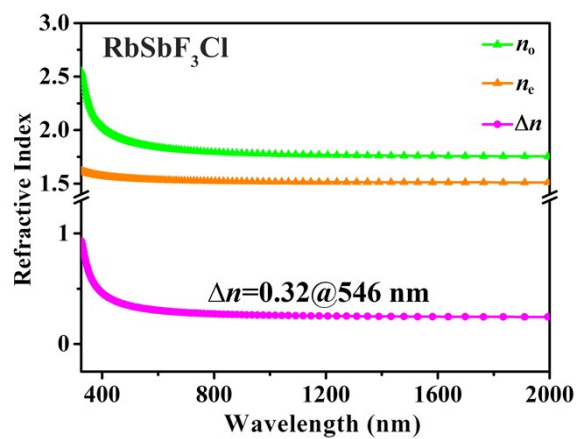

**Fig. S6** Calculated refractive index for RbSbF<sub>3</sub>Cl.



## References

- (1) G. M. Sheldrick, A short history of SHELX, *Acta Crystallogr., Sect. A: Found. Crystallogr.*, 2008, **64**, 112–122.
- (2) A. L. Spek, Single-crystal structure validation with the program PLATON, *J. Appl. Crystallogr.*, 2003, **36**, 7–13.
- (3) S. K. Kurtz and T. T. Perry, A Powder Technique for the Evaluation of Nonlinear Optical Materials, *J. Appl. Phys.*, 1968, **39**, 3798–3813.
- (4) M. D. Segall, P. J. D. Lindan, M. J. Probert, C. J. Pickard, P. J. Hasnip, S. J. Clark and M. C. Payne, First-principles simulation: ideas, illustrations and the CASTEP code, *J. Phys. Condens. Matter*, 2002, **14**, 2717–2744.
- (5) D. Vanderbilt, Soft self-consistent pseudopotentials in a generalized eigenvalue formalism, *Phys. Rev. B.*, 1990, **41**, 7892–7895.
- (6) K. Kobayashi, Norm-conserving pseudopotential database (NCPS97), *Comput. Mater. Sci.*, 1999, **14**, 72–76.
